# Supplementary material for: Effect of the Administration of a Lyophilised Faecal Capsules on the Intestinal Microbiome of Dogs: A Pilot Study
Source: MDPI journal article supplement (doi:10.3390/genes14091676), 2023-08-25
Supplement: s1 [file s1]

## Supplementary File 2

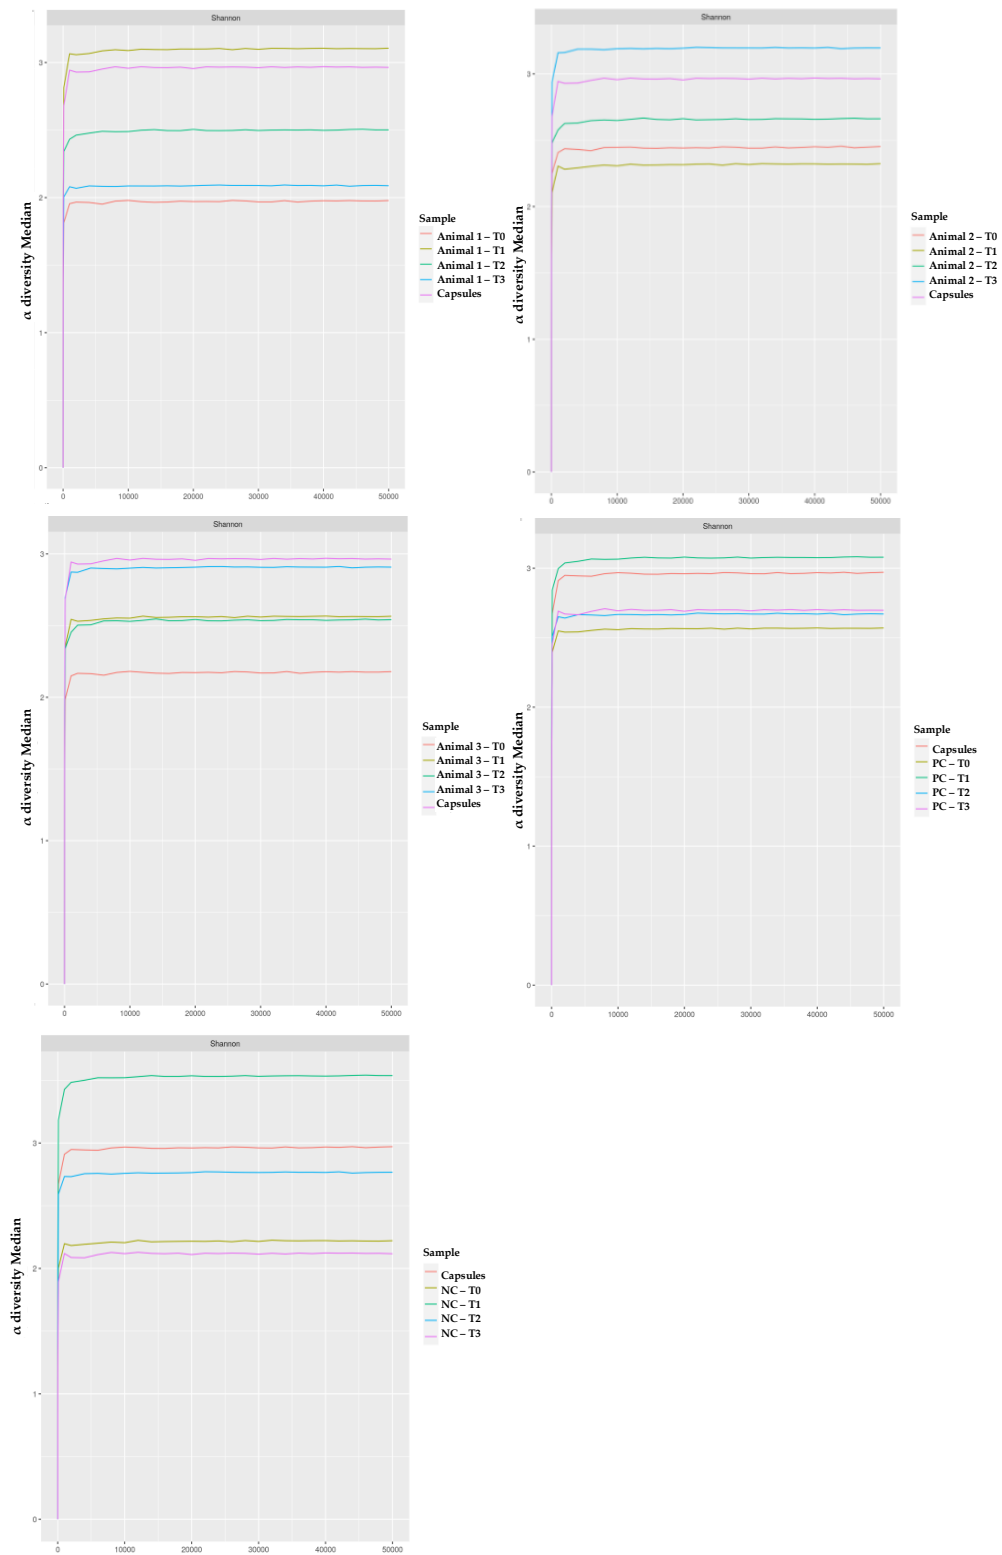

**Figure S2.** Representation of the  $\alpha$  diversity, via Shannon's index, of each faecal sample compared to that present in the FMT capsules.
