# Supplementary material for: Effect of the Administration of a Lyophilised Faecal Capsules on the Intestinal Microbiome of Dogs: A Pilot Study
Source: MDPI journal article supplement (doi:10.3390/genes14091676), 2023-08-25
Supplement: s1 [file s1]

Supplementary File 3

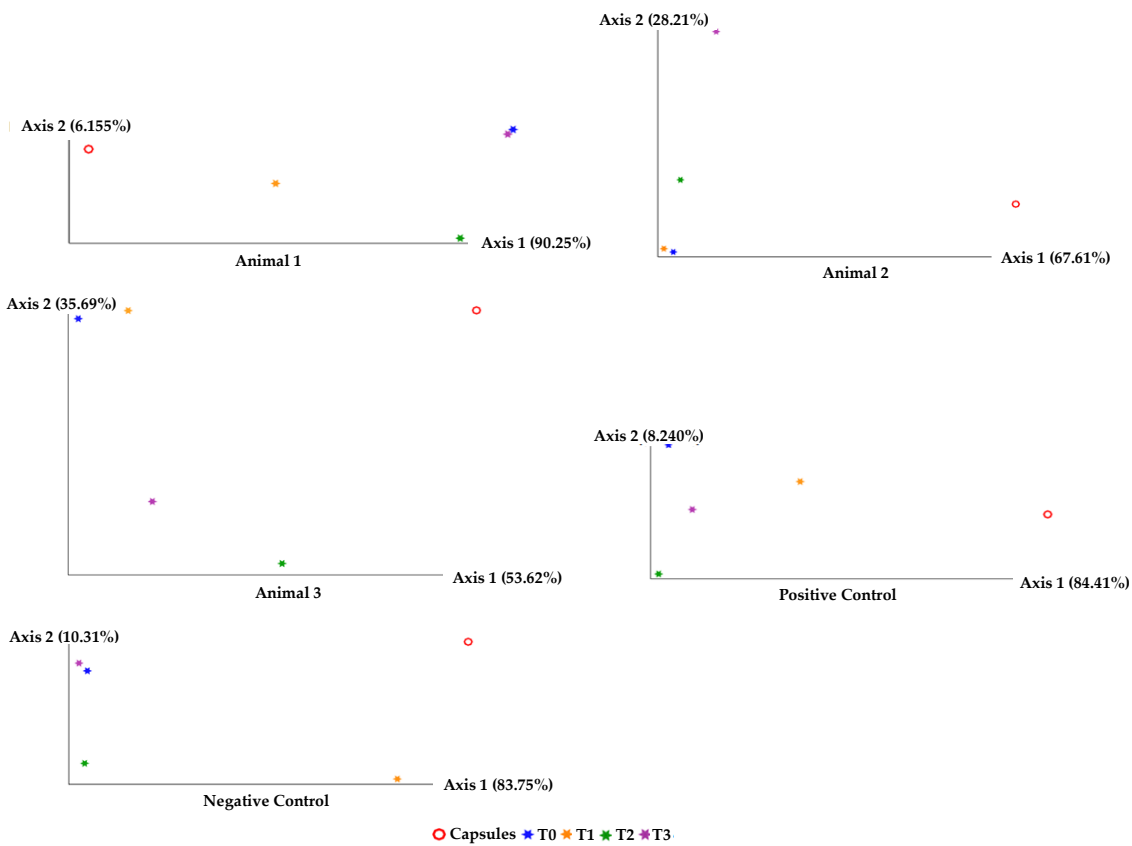

**Figure S3.**  $\beta$  Diversity expressed through a PCoA plot, depicting the differences present between faecal samples belonging to the same animal.
